# Supplementary material for: Resonance of KNbO3 nanofibers is effectively stimulated by ultrasound with low frequency and low power to enhance piezocatalytic activity
Source: Royal Society of Chemistry journal article supplement (doi:10.1039/d3ta08028e), 2024-01-01
Supplement: d3ta08028e1.pdf [file d3ta08028e1.pdf]

**Resonance of KNbO<sub>3</sub> nanofibers is effectively stimulated by ultrasound with low frequency and low power to enhance piezocatalytic activity**

Wanxing Zheng<sup>a</sup>, Yufei Tang<sup>\*ab</sup>, Chaofeng Jia<sup>a</sup>, Zhaowei Liu<sup>a</sup>, Zhuangzhuang Zhang<sup>a</sup>, Kang Zhao<sup>ab</sup>

<sup>a</sup> *Department of Materials Science and Engineering Xi'an University of Technology, Xi'an, 710048, PR China*

<sup>b</sup> *Shaanxi Province Key Laboratory of Corrosion and Protection, Xi'an University of Technology, Xi'an 710048, PR China*

\* Corresponding author.

E-mail: [yftang@xaut.edu.cn](mailto:yftang@xaut.edu.cn)

## Sieving the $\text{KNbO}_3$ nanofibers

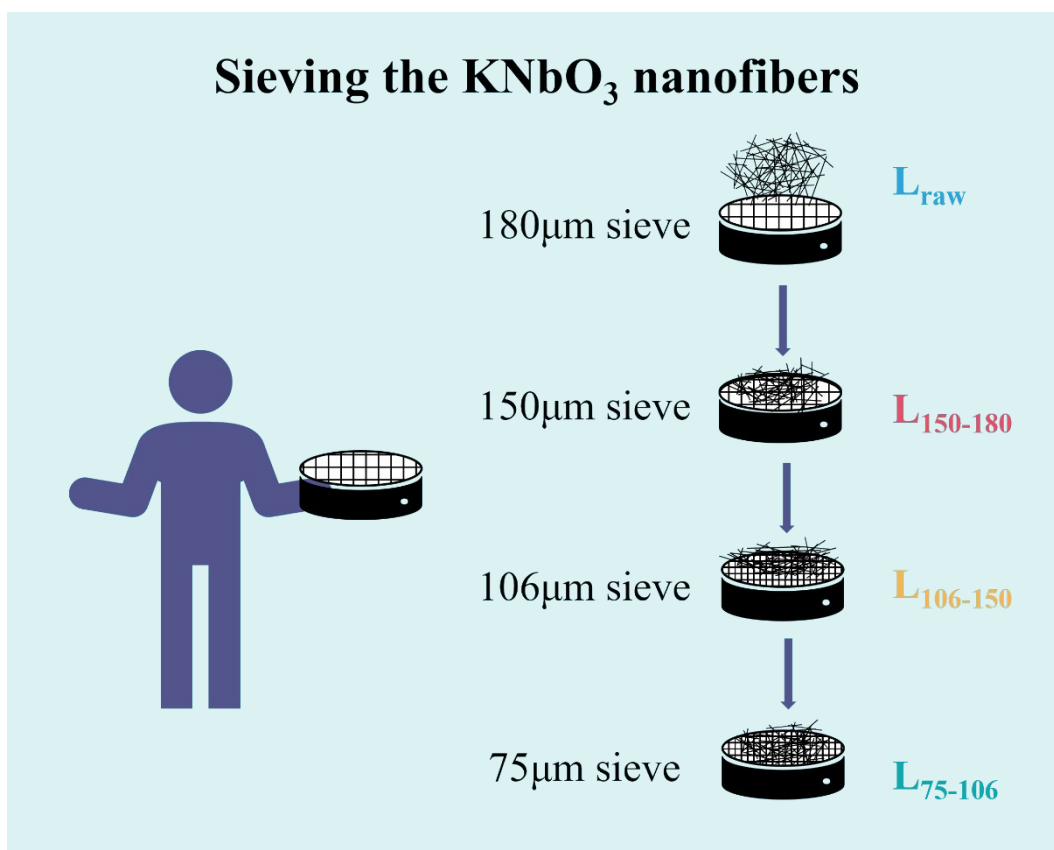

**Scheme S1.** The diagram of sieving  $\text{KNbO}_3$  nanofibers.

The XRD patterns of  $\text{KNbO}_3$  nanofibers treated with different calcination temperatures are shown in **Fig. S1**. The morphology of  $\text{KNbO}_3$  nanofibers obtained at 500°C and 600 °C are shown in **Fig. S2**. The morphology of  $\text{KNbO}_3$  nanofibers calcined at 500°C is similar to that of  $\text{KNbO}_3$  nanofibers calcined at 550°C, with good homogeneity of both nanofibers. When the calcination temperature is increased to 600°C, a fracture of some of the nanofibers can be observed in **Fig. S2b**, which is probably due to the increase in grain size (the XRD results show an increase of about 3 nm in the grain size of the  $\text{KNbO}_3$  nanofibers).

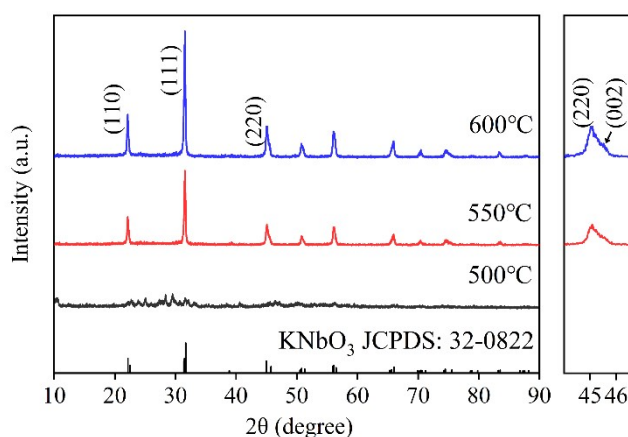

**Fig. S1.** XRD patterns of  $\text{KNbO}_3$  nanofibers at different calcination temperatures.

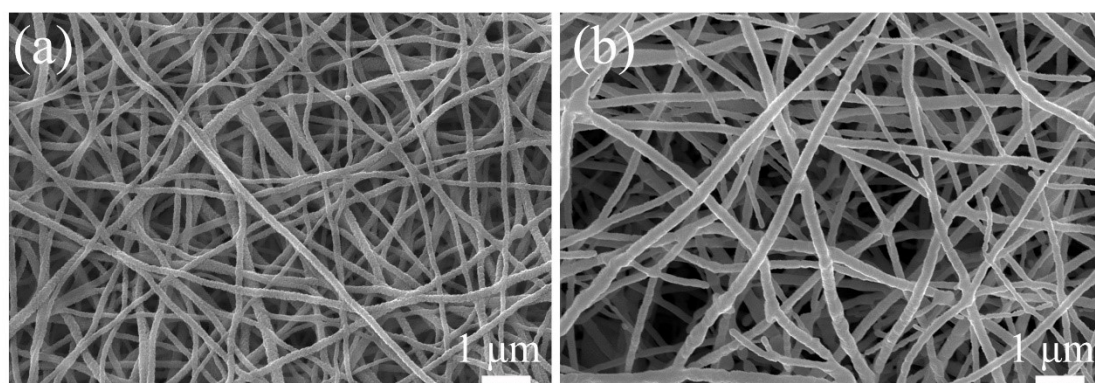

**Fig. S2.** SEM images of  $\text{KNbO}_3$  nanofibers obtained at different calcination temperatures (a) 500°C, (b) 600°C.

The  $N_2$  adsorption-desorption measurements of  $KNbO_3$  nanofibers obtained at different calcination temperatures are shown in **Fig. S3**, and the corresponding specific surface area and pore volume are summarized in **Table S1**. All the isotherms are identified as type IV, with H3 hysteresis loops, suggesting their porous structure. As shown in **Table S1**, the BET surface area of  $KNbO_3$ -550 and  $KNbO_3$ -600 are 12.099, and 5.891  $m^2/g$ , respectively. The smaller BET surface area of the latter may be due to the increase in crystalline size caused by the increase in calcination temperature, which results in grain build-up and a reduction in pores.

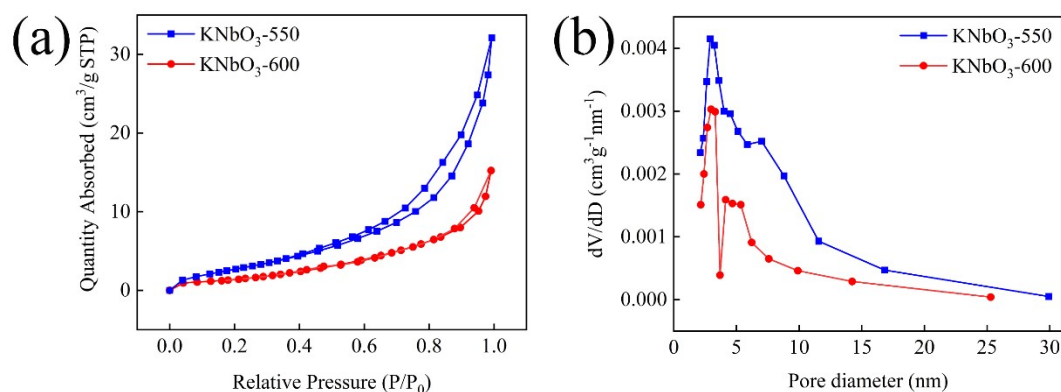

**Fig. S3.** (a)  $N_2$  adsorption-desorption curve and (b) BJH pore size distribution of  $KNbO_3$  nanofibers.

**Table S1.** Specific surface area and total pore volume of  $KNbO_3$  nanofibers.

| samples       | S ( $m^2/g$ , BET) | Pore volume ( $m^3/g$ , BET) |
|---------------|--------------------|------------------------------|
| $KNbO_3$ -550 | 12.099             | 0.050                        |
| $KNbO_3$ -600 | 5.891              | 0.024                        |

**Table S2.** Length of KNbO<sub>3</sub> nanofibers at natural frequencies close to 20 kHz, 30 kHz, and 40 kHz.

| Natural frequency (kHz) | Length ( $\mu\text{m}$ ) |
|-------------------------|--------------------------|
| 20                      | 154-155                  |
| 30                      | 122-123                  |
| 40                      | 103-104                  |

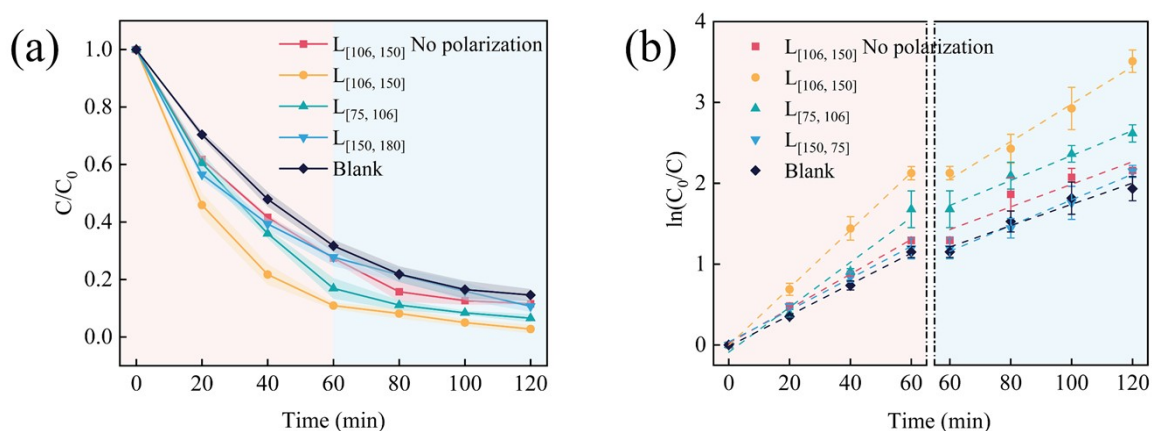

**Fig. S4.** The degradation curve(a) and the corresponding kinetic curves(b) of KNbO<sub>3</sub> nanofibers with and without a polarization at ultrasound frequencies of 30 kHz.

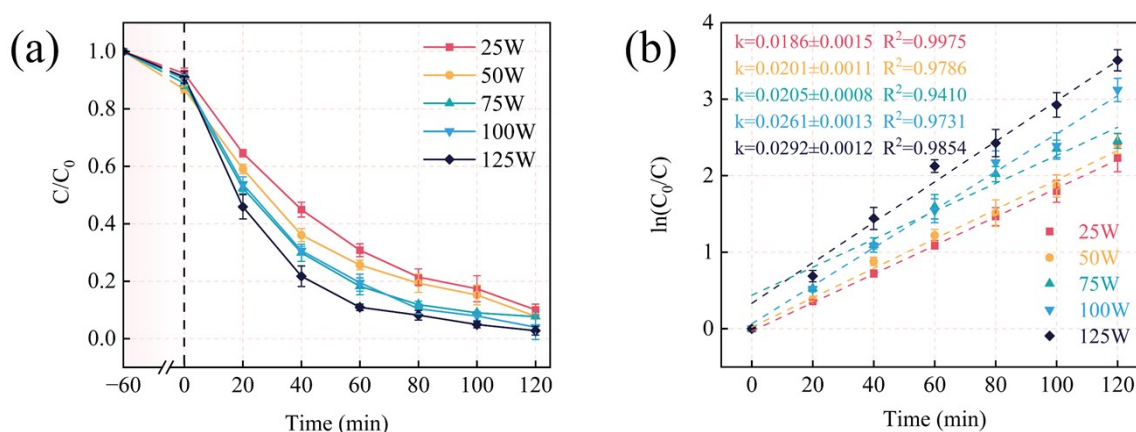

**Fig. S5.** The degradation curve(a) of  $\text{KNbO}_3$  nanofibers with diameters in range of 106-150 nm at different applied ultrasonic power and the corresponding kinetic curves(b). The ultrasound frequency is fixed at 30 kHz.

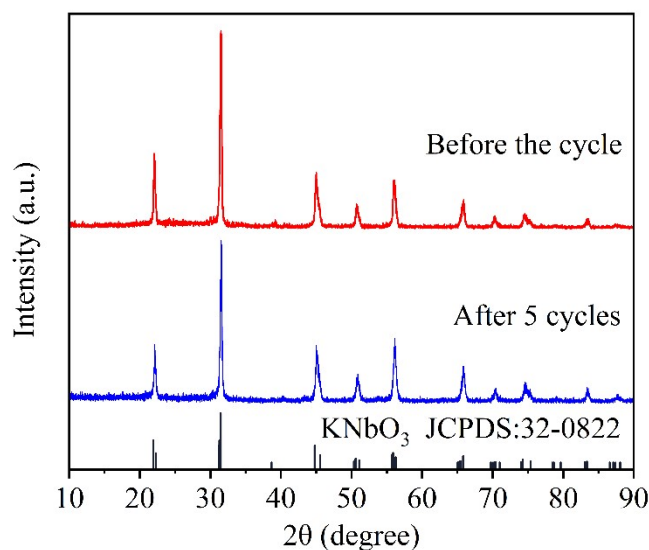

**Fig. S6.** XRD patterns of  $\text{KNbO}_3$  nanofibers before and after 5 cycles.

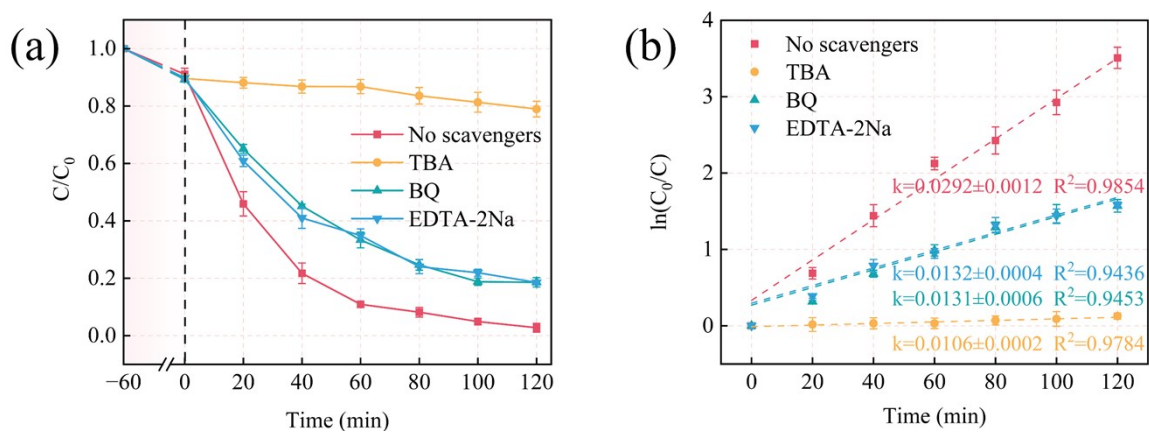

**Fig. S7.** The degradation curve(a) of  $\text{L}_{[106, 150]}$  in the presence of  $\cdot\text{OH}$ (TBA),  $\cdot\text{O}^2$ (BQ), and  $\text{h}^+$ (EDTA-2Na) scavengers and the corresponding kinetic curves(b). The ultrasonic frequency and power are fixed at 30kHz and 125W, respectively)

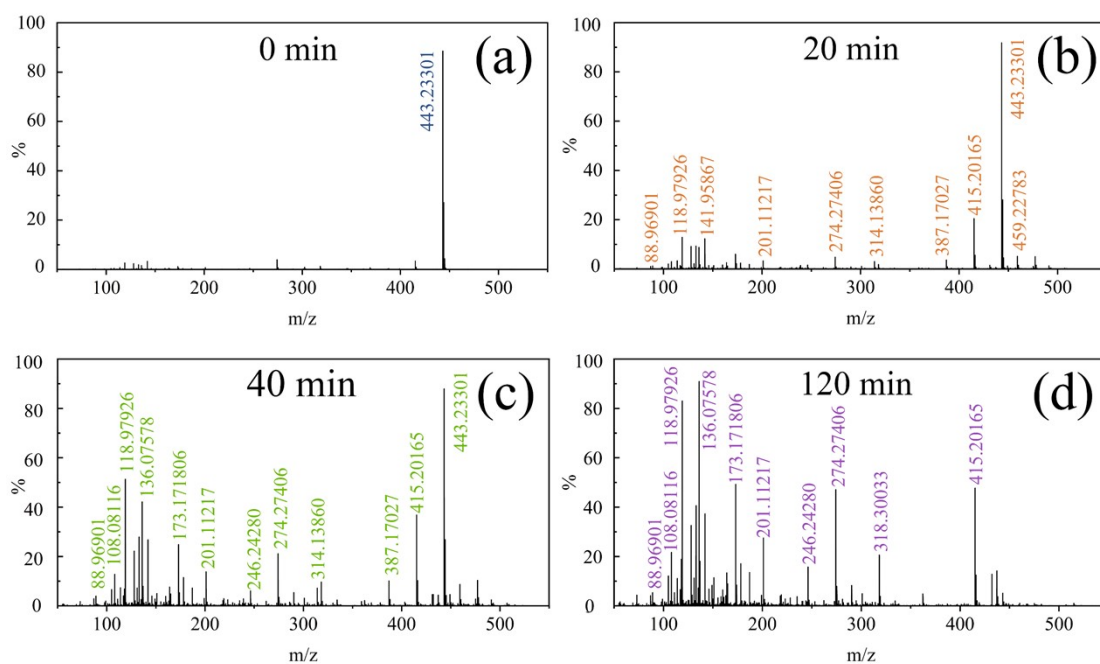

**Fig. S8.** Mass spectra for initial RhB(a) and RhB degradation in 20min(b), 40min(c), and 120min(d).

**Table S3.** Comparison of piezocatalytic activity with other catalysts.

| Catalysts<br>(mg)                | Pollutants (mg/L, mL) | Ultrasonic<br>(kHz, W) | Degradation<br>(%) | Kinetic constant<br>(min <sup>-1</sup> /(g·L <sup>-1</sup> )) | Ref.         |
|----------------------------------|-----------------------|------------------------|--------------------|---------------------------------------------------------------|--------------|
| KNbO <sub>3</sub> NF<br>(20mg)   | RhB 5mg/L, 100mL      | 30kHz,<br>100W         | 96.02              | 5.21                                                          | This<br>work |
| KNbO <sub>3</sub> NF<br>(20mg)   | RhB 5mg/L, 100mL      | 30kHz,<br>25W          | 92.7               | 3.72                                                          | This<br>work |
| KNbO <sub>3</sub> NS<br>(50mg)   | RhB 10mg/L, 100mL     | 40kHz,<br>110W         | 32.40              | 0.375                                                         | [S1]         |
| KNbO <sub>3</sub> NC<br>(50mg)   | RhB 10mg/L, 100mL     | 40kHz,<br>110W         | 9                  | 0.13                                                          | [S1]         |
| KNbO <sub>3</sub> NP<br>(100mg)  | MO 10mg/L, 100mL      | 40kHz,<br>120W         | 36.5               | 0.55                                                          | [S2]         |
| O-KNbO <sub>3</sub><br>NF (50mg) | RhB 10mg/L, 50mL      | 40kHz,<br>120W         | 13.9               | 0.221                                                         | [S3]         |

|                                 |                            |                |      |       |      |
|---------------------------------|----------------------------|----------------|------|-------|------|
| KNbO <sub>3</sub> NP<br>(100mg) | DLB 5B 5mg/L, 100mL        | 45kHz,<br>120W | 42.3 | 0.244 | [S4] |
| KNbO <sub>3</sub> NS<br>(10mg)  | Orange II 10mg/L,<br>200ml | 40kHz,<br>110W | 76.4 | 1.25  | [S5] |
| KNbO <sub>3</sub> NC<br>(50mg)  | RhB 10mg/L, 50mL           | 40kHz,<br>120W | 85.6 | 1.826 | [S6] |
| KNbO <sub>3</sub> NP<br>(100mg) | Ketamine 10mg/L,<br>100ml  | 40kHz,<br>300W | 60   | 0.39  | [S7] |
| KNbO <sub>3</sub> NS<br>(10mg)  | RhB 10mg/L, 50mL           | 40kHz,<br>300W | 87.5 | 1.55  | [S8] |
| KNbO <sub>3</sub> NP<br>(100mg) | MB 10mg/L, 500mL           | 20kHz,<br>375W | 30   | 0.53  | [S9] |

## References

- [S1] Yu D, Liu Z, Zhang J, *et al.* Enhanced catalytic performance by multi-field coupling in KNbO<sub>3</sub> nanostructures: Piezo-photocatalytic and ferro-photoelectrochemical effects. *Nano Energy* 2019, **58**: 695-705. <https://doi.org/10.1016/j.nanoen.2019.01.095>.
- [S2] Li Y, Chen H, Wang L, *et al.* KNbO<sub>3</sub>/ZnO heterojunction harvesting ultrasonic mechanical energy and solar energy to efficiently degrade methyl orange. *Ultrason Sonochem* 2021, **78**: 105754. <https://doi.org/10.1016/j.ultsonch.2021.105754>.
- [S3] Ma W, Du M, Li H, *et al.* The binary piezoelectric synergistic effect of KNbO<sub>3</sub>/MoS<sub>2</sub> heterojunction for improving photocatalytic performance. *J Alloys Compd* 2023, **960**: 170669. <https://doi.org/10.1016/j.jallcom.2023.170669>.



- [S4] Zhang Y, Shen G, Sheng C, *et al.* The effect of piezo-photocatalysis on enhancing the charge carrier separation in BaTiO<sub>3</sub>/KNbO<sub>3</sub> heterostructure photocatalyst. *Appl Surf Sci* 2021, **562**: 150164. <https://doi.org/10.1016/j.apsusc.2021.150164>.
- [S5] Li R, Cai Y, Liang S, *et al.* Improved piezocatalytic activity with Ag<sub>2</sub>O@ KNbO<sub>3</sub>: Mechanisms and performance in organic pollutant degradation. *Appl Surf Sci* 2024, **644**, 158811. <https://doi.org/10.1016/j.apsusc.2023.158811>
- [S6] Huang R, Cai W, Zhang H, *et al.* Highly synergistic and polarized KNbO<sub>3</sub>/WO<sub>3</sub> heterojunction for piezo-photocatalytic degradation of organic pollutant. *J Environ Chem Eng* 2023, **11**, 110177. <https://doi.org/10.1016/j.jece.2023.110177>
- [S7] Zhang H, Wei C, Huang Y, *et al.* Preparation of Er<sup>3+</sup>: Y<sub>3</sub>Al<sub>5</sub>O<sub>12</sub>/KNbO<sub>3</sub> composite and application in innocent treatment of ketamine by using sonocatalytic decomposition method. *J Hazard Mater* 2016, **317**, 667- 676. <https://doi.org/10.1016/j.jhazmat.2016.03.097>
- [S8] Luo H, Liu Z, Ma C, *et al.* 2D/2D KNbO<sub>3</sub>/MoS<sub>2</sub> heterojunctions for piezocatalysis: Insights into interfacial electric-fields and reactive oxygen species. *J Environ Chem Eng* 2023, **11**, 111521. <https://doi.org/10.1016/j.jece.2023.111521>
- [S9] Moraes, N P, Silva Souto R, Campos T. M. B., *et al.* Using KNbO<sub>3</sub> catalyst produced from a simple solid-state synthesis method in a new piezophotocatalytic ozonation hybrid process. *Ceram Int* 2023, **49**, 30090- 30103. <https://doi.org/10.1016/j.ceramint.2023.06.265>
